# Supplementary material for: Family with Sequence Similarity 83 Member H Promotes the Viability and Metastasis of Cervical Cancer Cells and Indicates a Poor Prognosis
Source: PubMed Central journal article supplement — Yonsei Med J. 2019 Jun 24;60(7):611–8. doi: 10.3349/ymj.2019.60.7.611 (PMC6597464; doi:10.3349/ymj.2019.60.7.611), 2019-06-24
Supplement: ymj-60-611-s001.pdf [file ymj-60-611-s001.pdf]

**Supplementary Table 1.** Detailed Clinical Information on the 304 Cervical Cancer Patients from the TCGA Database

| ID           | Futime | Fustat | Age (yr) | Gender | Race                                      | Grade | Clinical stage | Clinical T | Clinical M | Clinical N | Pathologic stage | Pathologic T | Pathologic M | Pathologic N | Cancer type |
|--------------|--------|--------|----------|--------|-------------------------------------------|-------|----------------|------------|------------|------------|------------------|--------------|--------------|--------------|-------------|
| TCGA-JW-A5VH | 100    | 1      | 53       | Female | American Indian or Alaska native          | G2    | Stage IVB      | Unknown    | Unknown    | Unknown    | Unknown          | T4           | M1           | NX           | CESC        |
| TCGA-C5-A1MQ | 1031   | 0      | 35       | Female | White                                     | G2    | Stage IIA      | Unknown    | Unknown    | Unknown    | Unknown          | T2b          | M0           | N0           | CESC        |
| TCGA-MU-A5YI | 1053   | 0      | 60       | Female | Black or African American                 | G2    | Stage IA1      | Unknown    | Unknown    | Unknown    | Unknown          | T1a1         | MX           | NX           | CESC        |
| TCGA-C5-A902 | 149    | 0      | 35       | Female | Black or African American                 | G3    | Stage IB2      | Unknown    | Unknown    | Unknown    | Unknown          | Unknown      | Unknown      | Unknown      | CESC        |
| TCGA-VS-A94Y | 144    | 1      | 47       | Female | White                                     | GX    | Stage IIB      | Unknown    | Unknown    | Unknown    | Unknown          | T2b          | MX           | NX           | CESC        |
| TCGA-EK-A2PG | 46     | 0      | 88       | Female | Black or African American                 | G3    | Unknown        | Unknown    | Unknown    | Unknown    | Unknown          | Unknown      | Unknown      | Unknown      | CESC        |
| TCGA-EA-A1QS | 1203   | 0      | 46       | Female | White                                     | G2    | Stage IB1      | Unknown    | Unknown    | Unknown    | Unknown          | T1b1         | M0           | N0           | CESC        |
| TCGA-C5-A8YR | 837    | 1      | 56       | Female | White                                     | G3    | Stage IB       | Unknown    | Unknown    | Unknown    | Unknown          | T1b          | M0           | N0           | CESC        |
| TCGA-IR-A3LL | 957    | 0      | 60       | Female | White                                     | G2    | Stage IB1      | Unknown    | Unknown    | Unknown    | Unknown          | T1b1         | M0           | N0           | CESC        |
| TCGA-Q1-A73S | 688    | 0      | 33       | Female | White                                     | G2    | Stage IB1      | Unknown    | Unknown    | Unknown    | Unknown          | T1b1         | MX           | N1           | CESC        |
| TCGA-LP-A4AX | 380    | 0      | 45       | Female | Asian                                     | G3    | Stage IB1      | Unknown    | Unknown    | Unknown    | Unknown          | T1b1         | M0           | N0           | CESC        |
| TCGA-VS-A954 | 1540   | 0      | 67       | Female | Unknown                                   | G2    | Stage IIIB     | Unknown    | Unknown    | Unknown    | Unknown          | T3b          | MX           | NX           | CESC        |
| TCGA-EA-A3HS | 959    | 0      | 35       | Female | White                                     | G1    | Stage IB       | Unknown    | Unknown    | Unknown    | Unknown          | T1b          | M0           | N0           | CESC        |
| TCGA-UC-A7PI | 2050   | 0      | 44       | Female | White                                     | G1    | Stage IB1      | Unknown    | Unknown    | Unknown    | Unknown          | T1b1         | MX           | N0           | CESC        |
| TCGA-ZJ-A8QR | 582    | 1      | 38       | Female | Native Hawaiian or other Pacific Islander | GX    | Stage I        | Unknown    | Unknown    | Unknown    | Unknown          | TX           | MX           | NX           | CESC        |
| TCGA-C5-A7UE | 4738   | 0      | 45       | Female | White                                     | G2    | Stage IB1      | Unknown    | Unknown    | Unknown    | Unknown          | Unknown      | Unknown      | Unknown      | CESC        |
| TCGA-DG-A2KJ | 1791   | 0      | 50       | Female | Unknown                                   | G3    | Stage IIIB     | Unknown    | Unknown    | Unknown    | Unknown          | T1b          | M0           | N1           | CESC        |
| TCGA-C5-A8YQ | 715    | 1      | 79       | Female | White                                     | G2    | Stage IB1      | Unknown    | Unknown    | Unknown    | Unknown          | Unknown      | Unknown      | Unknown      | CESC        |
| TCGA-UC-A7PF | 2859   | 1      | 44       | Female | Unknown                                   | G2    | Stage IB1      | Unknown    | Unknown    | Unknown    | Unknown          | T1b1         | M0           | N1           | CESC        |
| TCGA-EA-A43B | 791    | 0      | 43       | Female | White                                     | G2    | Stage IB1      | Unknown    | Unknown    | Unknown    | Unknown          | T1b1         | M0           | N0           | CESC        |
| TCGA-VS-A8EG | 1149   | 0      | 36       | Female | Unknown                                   | GX    | Stage IB1      | Unknown    | Unknown    | Unknown    | Unknown          | T1b1         | M0           | NX           | CESC        |
| TCGA-C5-A8XI | 254    | 0      | 69       | Female | Black or African American                 | G3    | Stage IB2      | Unknown    | Unknown    | Unknown    | Unknown          | T1b2         | MX           | N0           | CESC        |
| TCGA-VS-A9UV | 104    | 1      | 74       | Female | Unknown                                   | GX    | Stage IVA      | Unknown    | Unknown    | Unknown    | Unknown          | T4           | MX           | NX           | CESC        |
| TCGA-EK-A3GK | 15     | 0      | 33       | Female | White                                     | G3    | Stage IB1      | Unknown    | Unknown    | Unknown    | Unknown          | T1b1         | MX           | N0           | CESC        |
| TCGA-C5-A1MJ | 14     | 1      | 61       | Female | White                                     | G2    | Stage IB1      | Unknown    | Unknown    | Unknown    | Unknown          | T1b1         | MX           | N0           | CESC        |
| TCGA-EX-A69M | 253    | 1      | 62       | Female | White                                     | G3    | Stage IB2      | Unknown    | Unknown    | Unknown    | Unknown          | T1b2         | M0           | N0           | CESC        |

|              |      |   |    |        |                                  |         |         |            |         |         |         |         |         |         |         |      |
|--------------|------|---|----|--------|----------------------------------|---------|---------|------------|---------|---------|---------|---------|---------|---------|---------|------|
| TCGA-C5-A1M9 | 1065 | 1 | 46 | Female |                                  | White   | G3      | Stage IB1  | Unknown | Unknown | Unknown | Unknown | T3b     | M0      | N1      | CESC |
| TCGA-MU-A51Y | 854  | 0 | 27 | Female |                                  | White   | G2      | Stage IIA1 | Unknown | Unknown | Unknown | Unknown | T2a1    | MX      | N0      | CESC |
| TCGA-JW-A5VI | 747  | 0 | 45 | Female | American Indian or Alaska native |         | G3      | Stage IIB  | Unknown | Unknown | Unknown | Unknown | T2b     | MX      | NX      | CESC |
| TCGA-ZJ-AAXN | 0    | 0 | 34 | Female |                                  | White   | Unknown | Stage IB2  | Unknown | Unknown | Unknown | Unknown | T1b2    | M0      | N1      | CESC |
| TCGA-WL-A834 | 791  | 0 | 57 | Female |                                  | White   | G3      | Unknown    | Unknown | Unknown | Unknown | Unknown | T1b1    | Unknown | N1      | CESC |
| TCGA-ZJ-AAXB | 0    | 0 | 42 | Female |                                  | White   | G3      | Stage IB2  | Unknown | Unknown | Unknown | Unknown | T1b2    | M0      | N0      | CESC |
| TCGA-C5-A1BJ | 4385 | 0 | 34 | Female |                                  | White   | G2      | Stage IIB  | Unknown | CESC |
| TCGA-IR-A3LF | 2949 | 0 | 64 | Female |                                  | White   | G2      | Stage IB1  | Unknown | Unknown | Unknown | Unknown | T1b1    | M0      | N0      | CESC |
| TCGA-VS-A9UM | 829  | 1 | 39 | Female | Black or African American        |         | G2      | Stage IVB  | Unknown | Unknown | Unknown | Unknown | T3b     | MX      | NX      | CESC |
| TCGA-C5-A8ZZ | 636  | 0 | 41 | Female |                                  | White   | G2      | Stage IIB  | Unknown | CESC |
| TCGA-EA-A3HU | 1013 | 0 | 43 | Female |                                  | White   | G2      | Stage II   | Unknown | Unknown | Unknown | Unknown | T2a2    | M0      | N0      | CESC |
| TCGA-ZJ-A8QQ | 2056 | 0 | 24 | Female |                                  | White   | GX      | Stage IIB  | Unknown | Unknown | Unknown | Unknown | T1b2    | M0      | N0      | CESC |
| TCGA-EA-A1QT | 1243 | 0 | 47 | Female |                                  | White   | G2      | Stage IB   | Unknown | Unknown | Unknown | Unknown | T1b     | M0      | N0      | CESC |
| TCGA-EA-A50E | 227  | 1 | 45 | Female |                                  | Asian   | G2      | Stage IVA  | Unknown | Unknown | Unknown | Unknown | T4      | M0      | N1      | CESC |
| TCGA-C5-A8YT | 633  | 1 | 36 | Female |                                  | White   | G3      | Stage IB1  | Unknown | CESC |
| TCGA-R2-A69V | 596  | 0 | 42 | Female |                                  | White   | G3      | Stage IB   | Unknown | Unknown | Unknown | Unknown | T1b     | M0      | N0      | CESC |
| TCGA-DS-A1OA | 879  | 1 | 77 | Female |                                  | Asian   | G3      | Stage IB   | Unknown | Unknown | Unknown | Unknown | T1b1    | M0      | N1      | CESC |
| TCGA-FU-A3TQ | 795  | 0 | 55 | Female |                                  | White   | G2      | Stage IIIB | Unknown | Unknown | Unknown | Unknown | T2b     | MX      | N1      | CESC |
| TCGA-EK-A2RO | 2    | 0 | 59 | Female | American Indian or Alaska native |         | G1      | Stage IIB  | Unknown | CESC |
| TCGA-VS-A959 | 1379 | 0 | 76 | Female |                                  | Unknown | G3      | Stage IIB  | Unknown | Unknown | Unknown | Unknown | T2b     | MX      | NX      | CESC |
| TCGA-JW-A5VG | 834  | 0 | 35 | Female | American Indian or Alaska native |         | G3      | Stage IIA  | Unknown | Unknown | Unknown | Unknown | T2a     | MX      | NX      | CESC |
| TCGA-VS-A9U7 | 1290 | 0 | 30 | Female |                                  | White   | G3      | Stage IB1  | Unknown | Unknown | Unknown | Unknown | T1b     | M0      | N1      | CESC |
| TCGA-EK-A2IR | 3442 | 0 | 48 | Female |                                  | White   | G3      | Stage IB2  | Unknown | Unknown | Unknown | Unknown | T1b     | MX      | N0      | CESC |
| TCGA-FU-A40J | 426  | 0 | 38 | Female |                                  | White   | G3      | Stage IIIB | Unknown | Unknown | Unknown | Unknown | T2a1    | MX      | N1      | CESC |
| TCGA-VS-AA62 | 469  | 1 | 51 | Female |                                  | White   | G2      | Stage IIB  | Unknown | Unknown | Unknown | Unknown | T2b     | MX      | NX      | CESC |
| TCGA-DG-A2KH | 34   | 0 | 25 | Female |                                  | Unknown | GX      | Stage IB1  | Unknown | Unknown | Unknown | Unknown | T1b1    | M0      | N0      | CESC |
| TCGA-Q1-A73O | 428  | 0 | 37 | Female |                                  | Unknown | GX      | Stage IB2  | Unknown | Unknown | Unknown | Unknown | TX      | MX      | NX      | CESC |
| TCGA-MY-A5BF | 634  | 0 | 68 | Female |                                  | White   | G1      | Stage IIA2 | Unknown | Unknown | Unknown | Unknown | T2a2    | MX      | N0      | CESC |

|              |      |   |    |        |                           |         |            |         |         |         |         |         |         |         |         |      |
|--------------|------|---|----|--------|---------------------------|---------|------------|---------|---------|---------|---------|---------|---------|---------|---------|------|
| TCGA-C5-A1BE | 2094 | 1 | 64 | Female | White                     | G2      | Stage IB2  | Unknown | Unknown | Unknown | Unknown | T1b     | MX      | N1      | CESC    |      |
| TCGA-EK-A2PK | 12   | 0 | 43 | Female | White                     | G3      | Stage IB1  | Unknown | CESC |
| TCGA-GH-A9DA | 540  | 0 | 27 | Female | White                     | G3      | Stage IB1  | Unknown | Unknown | Unknown | Unknown | T1b     | MX      | N0      | CESC    |      |
| TCGA-DS-A5RQ | 208  | 0 | 80 | Female | White                     | G2      | Stage IB1  | Unknown | Unknown | Unknown | Unknown | T1b1    | MX      | N0      | CESC    |      |
| TCGA-EA-A3QE | 761  | 0 | 45 | Female | White                     | G2      | Stage IB   | Unknown | Unknown | Unknown | Unknown | T1b     | M0      | N0      | CESC    |      |
| TCGA-C5-A7CM | 619  | 0 | 35 | Female | White                     | G2      | Stage IB2  | Unknown | CESC |
| TCGA-C5-A8XK | 3039 | 0 | 30 | Female | Black or African American | G3      | Unknown    | Unknown | Unknown | Unknown | Unknown | Unknown | Unknown | Unknown | Unknown | CESC |
| TCGA-ZJ-AAXF | 0    | 0 | 62 | Female | Unknown                   | G3      | Stage IIB  | Unknown | Unknown | Unknown | Unknown | T2b     | M0      | N0      | CESC    |      |
| TCGA-MA-AA3X | 617  | 0 | 50 | Female | Black or African American | G2      | Stage IIIB | Unknown | Unknown | Unknown | Unknown | T3b     | MX      | NX      | CESC    |      |
| TCGA-C5-A7UC | 523  | 1 | 48 | Female | White                     | G3      | Stage IB   | Unknown | Unknown | Unknown | Unknown | T1b     | M0      | N0      | CESC    |      |
| TCGA-C5-A8XH | 1394 | 1 | 39 | Female | White                     | Unknown | Stage IB1  | Unknown | Unknown | Unknown | Unknown | T1b1    | MX      | N0      | CESC    |      |
| TCGA-Q1-A6DW | 534  | 0 | 44 | Female | White                     | GX      | Stage I    | Unknown | Unknown | Unknown | Unknown | TX      | MX      | NX      | CESC    |      |
| TCGA-C5-A0TN | 348  | 1 | 21 | Female | Black or African American | G3      | Stage IB2  | Unknown | Unknown | Unknown | Unknown | T1b     | MX      | N1      | CESC    |      |
| TCGA-C5-A7CH | 4694 | 0 | 43 | Female | White                     | G2      | Stage IIB  | Unknown | CESC |
| TCGA-DS-A1O9 | 266  | 1 | 75 | Female | White                     | G3      | Stage IVA  | Unknown | Unknown | Unknown | Unknown | T4      | M0      | N0      | CESC    |      |
| TCGA-JW-A852 | 252  | 1 | 42 | Female | White                     | G2      | Stage IIB  | Unknown | Unknown | Unknown | Unknown | T2b     | MX      | N1      | CESC    |      |
| TCGA-VS-A8QF | 1617 | 0 | 42 | Female | White                     | G2      | Stage IIB  | Unknown | Unknown | Unknown | Unknown | TX      | MX      | NX      | CESC    |      |
| TCGA-DS-A7WF | 492  | 1 | 41 | Female | Unknown                   | G3      | Stage IB2  | Unknown | Unknown | Unknown | Unknown | T1b2    | MX      | N0      | CESC    |      |
| TCGA-HM-A3JK | 351  | 0 | 64 | Female | White                     | G3      | Stage IIA2 | Unknown | Unknown | Unknown | Unknown | T2b     | MX      | N1      | CESC    |      |
| TCGA-ZJ-AAXI | 0    | 0 | 67 | Female | Unknown                   | G2      | Stage IIB  | Unknown | Unknown | Unknown | Unknown | T2b     | M0      | NX      | CESC    |      |
| TCGA-MA-AA43 | 346  | 0 | 48 | Female | White                     | G3      | Stage IIIB | Unknown | Unknown | Unknown | Unknown | T3b     | MX      | NX      | CESC    |      |
| TCGA-EA-A556 | 453  | 0 | 38 | Female | White                     | G3      | Stage IB1  | Unknown | Unknown | Unknown | Unknown | T1b1    | M0      | N0      | CESC    |      |
| TCGA-C5-A3HF | 543  | 1 | 24 | Female | White                     | G2      | Stage IB2  | Unknown | CESC |
| TCGA-VS-A8QA | 1099 | 0 | 44 | Female | Unknown                   | GX      | Stage IB1  | Unknown | Unknown | Unknown | Unknown | T1b1    | MX      | N0      | CESC    |      |
| TCGA-EA-A439 | 441  | 0 | 50 | Female | Asian                     | G3      | Stage IIA1 | Unknown | Unknown | Unknown | Unknown | T2a1    | M0      | N0      | CESC    |      |
| TCGA-C5-A7X3 | 284  | 1 | 70 | Female | White                     | G2      | Stage IIIB | Unknown | CESC |
| TCGA-VS-A9UQ | 1094 | 0 | 32 | Female | Unknown                   | G2      | Stage IB   | Unknown | Unknown | Unknown | Unknown | T1b     | MX      | N0      | CESC    |      |
| TCGA-MA-AA3Y | 542  | 0 | 48 | Female | White                     | G3      | Stage IB1  | Unknown | Unknown | Unknown | Unknown | T1b1    | M0      | N0      | CESC    |      |

|              |      |   |    |        |                           |         |            |         |         |         |         |         |         |         |      |
|--------------|------|---|----|--------|---------------------------|---------|------------|---------|---------|---------|---------|---------|---------|---------|------|
| TCGA-JX-A3Q0 | 5957 | 0 | 63 | Female | Black or African American | G2      | Stage III  | Unknown | Unknown | Unknown | Unknown | T3      | M0      | N0      | CESC |
| TCGA-EK-A2RA | 489  | 0 | 74 | Female | Unknown                   | G3      | Stage IIA2 | Unknown | Unknown | Unknown | Unknown | T2a2    | MX      | N0      | CESC |
| TCGA-Q1-A5R3 | 485  | 0 | 56 | Female | White                     | G2      | Unknown    | Unknown | Unknown | Unknown | Unknown | TX      | MX      | NX      | CESC |
| TCGA-EK-A2PM | 18   | 0 | 81 | Female | White                     | G3      | Stage IIB  | Unknown | CESC |
| TCGA-XS-A8TJ | 890  | 0 | 41 | Female | Black or African American | G2      | Stage IB1  | Unknown | Unknown | Unknown | Unknown | T1b1    | M0      | N1      | CESC |
| TCGA-ZX-AA5X | 119  | 0 | 64 | Female | White                     | G2      | Stage IIIB | Unknown | Unknown | Unknown | Unknown | TX      | MX      | NX      | CESC |
| TCGA-IR-A3LK | 908  | 1 | 69 | Female | White                     | G3      | Stage IB2  | Unknown | Unknown | Unknown | Unknown | T1b2    | M0      | N0      | CESC |
| TCGA-C5-A3HE | 548  | 0 | 44 | Female | White                     | G3      | Stage IB2  | Unknown | Unknown | Unknown | Unknown | T1b2    | M0      | N0      | CESC |
| TCGA-EA-A44S | 369  | 0 | 31 | Female | White                     | G2      | Stage IIIB | Unknown | Unknown | Unknown | Unknown | T2a2    | M0      | N1      | CESC |
| TCGA-VS-A9V0 | 573  | 0 | 58 | Female | Unknown                   | G3      | Stage IB   | Unknown | Unknown | Unknown | Unknown | T1b     | MX      | NX      | CESC |
| TCGA-MY-A5BD | 1667 | 0 | 62 | Female | White                     | G1      | Stage IIB  | Unknown | Unknown | Unknown | Unknown | T2b     | M0      | N0      | CESC |
| TCGA-EK-A2PI | 42   | 0 | 44 | Female | White                     | G2      | Stage IIIB | Unknown | CESC |
| TCGA-EK-A3GN | 27   | 0 | 47 | Female | White                     | G3      | Stage IIIB | Unknown | Unknown | Unknown | Unknown | TX      | Unknown | NX      | CESC |
| TCGA-EX-A449 | 447  | 0 | 42 | Female | White                     | G1      | Stage IVB  | Unknown | Unknown | Unknown | Unknown | T1b1    | M1      | NX      | CESC |
| TCGA-EX-A1H5 | 619  | 0 | 58 | Female | Black or African American | G3      | Stage IIB  | Unknown | Unknown | Unknown | Unknown | T2b     | MX      | N1      | CESC |
| TCGA-ZJ-AB0I | 0    | 0 | 25 | Female | White                     | Unknown | Stage IIB  | Unknown | Unknown | Unknown | Unknown | T2b     | MX      | N1      | CESC |
| TCGA-EX-A8YF | 473  | 0 | 44 | Female | White                     | G3      | Stage IB1  | Unknown | Unknown | Unknown | Unknown | T2a1    | M0      | N0      | CESC |
| TCGA-DS-A0VM | 3589 | 0 | 51 | Female | White                     | G3      | Stage IB   | Unknown | Unknown | Unknown | Unknown | T1b1    | M0      | N1      | CESC |
| TCGA-VS-A9UJ | 52   | 1 | 55 | Female | Unknown                   | GX      | Stage IIB  | Unknown | Unknown | Unknown | Unknown | T2b     | MX      | NX      | CESC |
| TCGA-FU-A23L | 725  | 0 | 60 | Female | White                     | G3      | Stage IIA1 | Unknown | Unknown | Unknown | Unknown | T2a1    | MX      | N0      | CESC |
| TCGA-EK-A3GM | 0    | 0 | 65 | Female | White                     | G2      | Stage IIA  | Unknown | CESC |
| TCGA-DG-A2KL | 1367 | 0 | 53 | Female | Unknown                   | G1      | Stage IIA  | Unknown | Unknown | Unknown | Unknown | T2a     | M0      | N0      | CESC |
| TCGA-VS-A8QH | 1210 | 1 | 76 | Female | White                     | G2      | Stage IB1  | Unknown | Unknown | Unknown | Unknown | TX      | MX      | NX      | CESC |
| TCGA-EA-A5ZD | 457  | 0 | 40 | Female | Asian                     | G2      | Stage IB1  | Unknown | Unknown | Unknown | Unknown | T1b1    | M0      | N0      | CESC |
| TCGA-ZJ-AAXD | 0    | 0 | 35 | Female | Unknown                   | G2      | Stage IIIB | Unknown | Unknown | Unknown | Unknown | T3b     | M0      | N0      | CESC |
| TCGA-FU-A3WB | 491  | 0 | 43 | Female | White                     | G2      | Stage IIA2 | Unknown | Unknown | Unknown | Unknown | T2a2    | MX      | N0      | CESC |
| TCGA-C5-A901 | 518  | 0 | 44 | Female | White                     | G2      | Unknown    | Unknown | Unknown | Unknown | Unknown | TX      | MX      | N1      | CESC |
| TCGA-HM-A4S6 | 454  | 0 | 51 | Female | White                     | G3      | Stage IIIB | Unknown | Unknown | Unknown | Unknown | T1b2    | MX      | N1      | CESC |

|              |      |   |    |        |                                  |         |            |         |         |         |         |         |         |         |      |
|--------------|------|---|----|--------|----------------------------------|---------|------------|---------|---------|---------|---------|---------|---------|---------|------|
| TCGA-VS-A9U6 | 1320 | 0 | 52 | Female | White                            | GX      | Stage IVB  | Unknown | Unknown | Unknown | Unknown | T4      | M1      | NX      | CESC |
| TCGA-VS-A8EI | 549  | 0 | 38 | Female | White                            | GX      | Stage IIB  | Unknown | Unknown | Unknown | Unknown | T3b     | M0      | NX      | CESC |
| TCGA-EA-A5O9 | 423  | 0 | 39 | Female | White                            | G2      | Stage IB2  | Unknown | Unknown | Unknown | Unknown | T1b2    | M0      | N0      | CESC |
| TCGA-ZJ-AAXJ | 0    | 0 | 43 | Female | Unknown                          | Unknown | Stage IIB  | Unknown | Unknown | Unknown | Unknown | T2b     | MX      | N0      | CESC |
| TCGA-C5-A1MI | 1083 | 1 | 50 | Female | White                            | G2      | Stage IB1  | Unknown | Unknown | Unknown | Unknown | T1b1    | M0      | N1      | CESC |
| TCGA-Q1-A73R | 567  | 0 | 45 | Female | White                            | GX      | Stage I    | Unknown | Unknown | Unknown | Unknown | TX      | MX      | NX      | CESC |
| TCGA-JW-A69B | 863  | 0 | 44 | Female | White                            | GX      | Stage IB2  | Unknown | Unknown | Unknown | Unknown | T1b2    | MX      | NX      | CESC |
| TCGA-C5-A2LV | 2234 | 0 | 36 | Female | Black or African American        | G3      | Stage IB   | Unknown | Unknown | Unknown | Unknown | T1b     | MX      | N1      | CESC |
| TCGA-DR-A0ZL | 2669 | 0 | 53 | Female | Asian                            | G3      | Stage IB   | Unknown | Unknown | Unknown | Unknown | T1b1    | M0      | N0      | CESC |
| TCGA-MY-A913 | 524  | 0 | 28 | Female | Black or African American        | G3      | Stage IIA  | Unknown | Unknown | Unknown | Unknown | Tis     | M1      | N0      | CESC |
| TCGA-DS-A1OD | 3874 | 0 | 49 | Female | White                            | G3      | Stage IB1  | Unknown | Unknown | Unknown | Unknown | T1b1    | M0      | N0      | CESC |
| TCGA-FU-A3YQ | 861  | 0 | 35 | Female | White                            | G1      | Stage IB1  | Unknown | Unknown | Unknown | Unknown | T1b1    | MX      | N0      | CESC |
| TCGA-EA-A411 | 747  | 0 | 50 | Female | White                            | G2      | Stage IB1  | Unknown | Unknown | Unknown | Unknown | T1b1    | M0      | N0      | CESC |
| TCGA-EK-A2IP | 202  | 0 | 28 | Female | White                            | G3      | Stage IB1  | Unknown | Unknown | Unknown | Unknown | T1b1    | MX      | N0      | CESC |
| TCGA-JW-A5VJ | 588  | 0 | 56 | Female | American Indian or Alaska native | G3      | Stage IIB  | Unknown | Unknown | Unknown | Unknown | T2b     | MX      | NX      | CESC |
| TCGA-VS-A957 | 1462 | 0 | 64 | Female | White                            | G3      | Stage IB1  | Unknown | Unknown | Unknown | Unknown | T1b1    | MX      | NX      | CESC |
| TCGA-C5-A1M6 | 955  | 1 | 55 | Female | White                            | G3      | Stage IIB  | Unknown | CESC |
| TCGA-VS-A9UD | 599  | 0 | 73 | Female | White                            | G2      | Stage IIIA | Unknown | Unknown | Unknown | Unknown | T3a     | MX      | NX      | CESC |
| TCGA-C5-A8XJ | 4467 | 0 | 74 | Female | White                            | Unknown | Stage IB   | Unknown | CESC |
| TCGA-EA-A3QD | 397  | 0 | 59 | Female | White                            | G3      | Stage IIIB | Unknown | Unknown | Unknown | Unknown | T1b1    | M0      | N1      | CESC |
| TCGA-MA-AA42 | 259  | 0 | 75 | Female | White                            | G3      | Stage IIB  | Unknown | Unknown | Unknown | Unknown | T2b     | M0      | N0      | CESC |
| TCGA-DS-A0VL | 1692 | 1 | 25 | Female | White                            | G2      | Stage IB   | Unknown | Unknown | Unknown | Unknown | T1b1    | M0      | N0      | CESC |
| TCGA-UC-A7PD | 355  | 1 | 21 | Female | American Indian or Alaska native | G2      | Stage IB   | Unknown | Unknown | Unknown | Unknown | T1b     | M0      | N0      | CESC |
| TCGA-C5-A1BN | 166  | 1 | 26 | Female | White                            | G3      | Stage IB2  | Unknown | CESC |
| TCGA-VS-A8EK | 829  | 1 | 65 | Female | White                            | G2      | Stage IVA  | Unknown | Unknown | Unknown | Unknown | T4      | M0      | NX      | CESC |
| TCGA-C5-A1BM | 2520 | 1 | 78 | Female | Black or African American        | G2      | Stage IB   | Unknown | Unknown | Unknown | Unknown | T2      | MX      | N1      | CESC |
| TCGA-EK-A2GZ | 383  | 0 | 64 | Female | Black or African American        | G2      | Stage IIIB | Unknown | CESC |
| TCGA-VS-A8Q8 | 978  | 1 | 26 | Female | White                            | G2      | Stage IB   | Unknown | Unknown | Unknown | Unknown | T1b     | MX      | N0      | CESC |

|              |      |   |    |        |                                           |    |            |         |         |         |         |         |         |         |      |
|--------------|------|---|----|--------|-------------------------------------------|----|------------|---------|---------|---------|---------|---------|---------|---------|------|
| TCGA-VS-A8EB | 305  | 1 | 41 | Female | White                                     | GX | Stage IIIB | Unknown | Unknown | Unknown | Unknown | T3b     | M1      | NX      | CESC |
| TCGA-2W-A8YY | 533  | 0 | 51 | Female | White                                     | G3 | Stage IB2  | Unknown | Unknown | Unknown | Unknown | T2a2    | M0      | N0      | CESC |
| TCGA-C5-A907 | 361  | 0 | 47 | Female | White                                     | G2 | Stage IB2  | Unknown | CESC |
| TCGA-VS-A8Q9 | 1630 | 0 | 79 | Female | White                                     | G2 | Stage IB1  | Unknown | Unknown | Unknown | Unknown | TX      | MX      | NX      | CESC |
| TCGA-VS-A8EH | 804  | 0 | 56 | Female | Unknown                                   | G2 | Stage IIIB | Unknown | Unknown | Unknown | Unknown | T3b     | M0      | NX      | CESC |
| TCGA-EK-A2RK | 13   | 0 | 67 | Female | White                                     | G3 | Stage IA2  | Unknown | Unknown | Unknown | Unknown | T1b1    | MX      | N0      | CESC |
| TCGA-C5-A7CO | 4482 | 0 | 68 | Female | White                                     | G2 | Stage IB2  | Unknown | CESC |
| TCGA-EA-A6QX | 413  | 0 | 49 | Female | Asian                                     | G3 | Stage IIIB | Unknown | Unknown | Unknown | Unknown | T1b1    | M0      | N1      | CESC |
| TCGA-EX-A3L1 | 463  | 0 | 32 | Female | White                                     | G3 | Stage IIA1 | Unknown | Unknown | Unknown | Unknown | T2a1    | M0      | N0      | CESC |
| TCGA-JX-A3PZ | 642  | 1 | 25 | Female | White                                     | G2 | Stage IB   | Unknown | Unknown | Unknown | Unknown | T1b     | M0      | N0      | CESC |
| TCGA-C5-A1BF | 570  | 1 | 46 | Female | White                                     | G1 | Stage IB   | Unknown | Unknown | Unknown | Unknown | TX      | MX      | N0      | CESC |
| TCGA-VS-A9UT | 482  | 0 | 72 | Female | Asian                                     | G3 | Stage IB   | Unknown | Unknown | Unknown | Unknown | T1b1    | MX      | N1      | CESC |
| TCGA-4J-AA1J | 406  | 0 | 31 | Female | White                                     | G3 | Stage IB2  | Unknown | Unknown | Unknown | Unknown | T1b2    | M0      | N0      | CESC |
| TCGA-EK-A3GJ | 3    | 0 | 51 | Female | Native Hawaiian or other Pacific Islander | G3 | Stage IB1  | Unknown | Unknown | Unknown | Unknown | T1b1    | Unknown | N0      | CESC |
| TCGA-EK-A2R8 | 44   | 0 | 48 | Female | White                                     | G3 | Stage IB2  | Unknown | Unknown | Unknown | Unknown | T1b2    | MX      | N1      | CESC |
| TCGA-C5-A7CJ | 3097 | 1 | 42 | Female | White                                     | G2 | Stage IIA  | Unknown | Unknown | Unknown | Unknown | T2a     | MX      | N1      | CESC |
| TCGA-EK-A2RL | 1453 | 1 | 32 | Female | Black or African American                 | G2 | Stage IB   | Unknown | Unknown | Unknown | Unknown | T1b1    | MX      | N1      | CESC |
| TCGA-DS-A1OB | 861  | 1 | 45 | Female | White                                     | G2 | Stage IB   | Unknown | Unknown | Unknown | Unknown | T1b2    | M0      | N1      | CESC |
| TCGA-JW-A5VK | 623  | 0 | 43 | Female | Black or African American                 | G3 | Stage IB2  | Unknown | Unknown | Unknown | Unknown | T1b2    | MX      | NX      | CESC |
| TCGA-C5-A7X8 | 83   | 0 | 35 | Female | White                                     | G2 | Stage IB1  | Unknown | Unknown | Unknown | Unknown | T2a     | M0      | N1      | CESC |
| TCGA-BI-A20A | 462  | 0 | 49 | Female | White                                     | G3 | Stage IB1  | Unknown | Unknown | Unknown | Unknown | T1b1    | M0      | N0      | CESC |
| TCGA-EK-A2H1 | 799  | 0 | 20 | Female | White                                     | G3 | Stage IB2  | Unknown | CESC |
| TCGA-IR-A3L7 | 4483 | 0 | 37 | Female | White                                     | G3 | Stage IB1  | Unknown | Unknown | Unknown | Unknown | T1b1    | M0      | N0      | CESC |
| TCGA-C5-A1MP | 109  | 0 | 34 | Female | Black or African American                 | G3 | Stage IB2  | Unknown | Unknown | Unknown | Unknown | T1b2    | MX      | N1      | CESC |
| TCGA-C5-A1ML | 636  | 1 | 49 | Female | White                                     | G3 | Stage IB2  | Unknown | CESC |
| TCGA-Q1-A6DV | 491  | 0 | 36 | Female | Asian                                     | G2 | Stage IB1  | Unknown | Unknown | Unknown | Unknown | T1b1    | M0      | N0      | CESC |
| TCGA-C5-A1M8 | 919  | 0 | 43 | Female | White                                     | G2 | Stage IB1  | Unknown | Unknown | Unknown | Unknown | T1b     | MX      | N0      | CESC |
| TCGA-VS-A9UB | 648  | 0 | 54 | Female | Unknown                                   | G3 | Stage IIB  | Unknown | Unknown | Unknown | Unknown | T2b     | MX      | N0      | CESC |

|              |      |   |    |        |                           |    |            |         |         |         |         |         |         |         |      |
|--------------|------|---|----|--------|---------------------------|----|------------|---------|---------|---------|---------|---------|---------|---------|------|
| TCGA-VS-A953 | 477  | 1 | 63 | Female | Unknown                   | GX | Stage IVA  | Unknown | Unknown | Unknown | Unknown | T4      | MX      | NX      | CESC |
| TCGA-C5-A1BK | 5385 | 0 | 36 | Female | Black or African American | G2 | Stage IB   | Unknown | Unknown | Unknown | Unknown | T1b     | MX      | N0      | CESC |
| TCGA-VS-A8QC | 350  | 1 | 51 | Female | White                     | G2 | Stage IVA  | Unknown | Unknown | Unknown | Unknown | TX      | MX      | NX      | CESC |
| TCGA-EK-A2RB | 9    | 0 | 48 | Female | White                     | G3 | Stage IVB  | Unknown | CESC |
| TCGA-ZJ-AAXU | 5    | 0 | 51 | Female | White                     | G2 | Stage IIB  | Unknown | Unknown | Unknown | Unknown | T2b     | M0      | N0      | CESC |
| TCGA-DS-A0VN | 3609 | 0 | 47 | Female | White                     | G2 | Stage IB   | Unknown | Unknown | Unknown | Unknown | T1b2    | M0      | N0      | CESC |
| TCGA-LP-A4AW | 27   | 0 | 52 | Female | Asian                     | G1 | Stage IA   | Unknown | Unknown | Unknown | Unknown | T1b     | M0      | N0      | CESC |
| TCGA-DS-A3LQ | 699  | 0 | 46 | Female | Unknown                   | G3 | Stage IIB  | Unknown | Unknown | Unknown | Unknown | T3b     | M0      | N1      | CESC |
| TCGA-C5-A7UI | 2888 | 1 | 42 | Female | Black or African American | G3 | Stage IB1  | Unknown | Unknown | Unknown | Unknown | T1b1    | MX      | N0      | CESC |
| TCGA-C5-A2LS | 1345 | 0 | 37 | Female | White                     | G1 | Stage IB2  | Unknown | Unknown | Unknown | Unknown | T1b2    | M0      | N0      | CESC |
| TCGA-IR-A3LA | 4078 | 0 | 60 | Female | White                     | G3 | Stage IB1  | Unknown | Unknown | Unknown | Unknown | T1b1    | M0      | N0      | CESC |
| TCGA-C5-A2LT | 2226 | 0 | 38 | Female | White                     | G3 | Stage IB   | Unknown | Unknown | Unknown | Unknown | T1b     | M0      | N0      | CESC |
| TCGA-MA-AA3Z | 595  | 0 | 43 | Female | White                     | GX | Stage IB2  | Unknown | Unknown | Unknown | Unknown | T1b2    | M0      | N0      | CESC |
| TCGA-C5-A2LX | 2526 | 0 | 54 | Female | White                     | G2 | Stage IB1  | Unknown | Unknown | Unknown | Unknown | T2      | MX      | N1      | CESC |
| TCGA-C5-A2M2 | 1011 | 1 | 56 | Female | White                     | G2 | Stage IB2  | Unknown | CESC |
| TCGA-ZJ-AAX4 | 21   | 0 | 85 | Female | White                     | G3 | Stage II   | Unknown | Unknown | Unknown | Unknown | T2      | M0      | N0      | CESC |
| TCGA-VS-A9UI | 1246 | 0 | 76 | Female | White                     | GX | Stage IIB  | Unknown | Unknown | Unknown | Unknown | T2b     | MX      | NX      | CESC |
| TCGA-VS-A9UY | 555  | 1 | 29 | Female | Unknown                   | G2 | Stage IVB  | Unknown | Unknown | Unknown | Unknown | T1b2    | MX      | NX      | CESC |
| TCGA-VS-A9V3 | 453  | 0 | 62 | Female | White                     | G3 | Stage IVB  | Unknown | Unknown | Unknown | Unknown | T4      | MX      | NX      | CESC |
| TCGA-C5-A2M1 | 1169 | 0 | 37 | Female | White                     | G2 | Stage IB1  | Unknown | Unknown | Unknown | Unknown | T1b1    | MX      | N0      | CESC |
| TCGA-JX-A3Q8 | 922  | 0 | 40 | Female | Asian                     | G3 | Stage IB1  | Unknown | Unknown | Unknown | Unknown | T1b1    | MX      | N0      | CESC |
| TCGA-MA-AA3W | 685  | 0 | 54 | Female | White                     | G3 | Stage IB1  | Unknown | Unknown | Unknown | Unknown | T1b1    | M0      | N1      | CESC |
| TCGA-EA-A78R | 410  | 0 | 54 | Female | Asian                     | G2 | Stage IB1  | Unknown | Unknown | Unknown | Unknown | T1b1    | M0      | NX      | CESC |
| TCGA-FU-A23K | 372  | 0 | 28 | Female | White                     | G3 | Stage IIB  | Unknown | Unknown | Unknown | Unknown | T1b1    | MX      | N1      | CESC |
| TCGA-C5-A1M7 | 1409 | 0 | 37 | Female | White                     | G2 | Stage IB   | Unknown | Unknown | Unknown | Unknown | T1b     | MX      | N0      | CESC |
| TCGA-LP-A4AU | 343  | 0 | 35 | Female | Asian                     | G3 | Stage IIB  | Unknown | Unknown | Unknown | Unknown | T2      | M0      | N1      | CESC |
| TCGA-IR-A3LI | 2493 | 0 | 48 | Female | White                     | G2 | Stage IVB  | Unknown | Unknown | Unknown | Unknown | T2b     | M1      | N1      | CESC |
| TCGA-DS-A7WI | 252  | 1 | 43 | Female | White                     | G2 | Stage IIA2 | Unknown | Unknown | Unknown | Unknown | T2a2    | MX      | N1      | CESC |

|              |      |   |    |        |                           |    |            |         |         |         |         |         |         |         |         |      |
|--------------|------|---|----|--------|---------------------------|----|------------|---------|---------|---------|---------|---------|---------|---------|---------|------|
| TCGA-EX-A69L | 602  | 0 | 41 | Female | Asian                     | G3 | Stage IB1  | Unknown | Unknown | Unknown | Unknown | T1b1    | M0      | N0      | CESC    |      |
| TCGA-EA-A3HR | 940  | 0 | 57 | Female | White                     | G2 | Stage II   | Unknown | Unknown | Unknown | Unknown | T2a     | M0      | N0      | CESC    |      |
| TCGA-BI-A0VS | 1735 | 0 | 48 | Female | White                     | G3 | Stage IB   | Unknown | Unknown | Unknown | Unknown | T1b1    | M0      | N0      | CESC    |      |
| TCGA-EA-A5ZE | 456  | 0 | 54 | Female | Asian                     | G3 | Stage IB1  | Unknown | Unknown | Unknown | Unknown | T1b1    | M0      | N0      | CESC    |      |
| TCGA-ZJ-AAX8 | 0    | 0 | 58 | Female | Unknown                   | G2 | Stage IIIB | Unknown | Unknown | Unknown | Unknown | T3b     | M0      | N1      | CESC    |      |
| TCGA-VS-A9UL | 442  | 1 | 79 | Female | White                     | G3 | Stage IIIB | Unknown | Unknown | Unknown | Unknown | T3b     | MX      | NX      | CESC    |      |
| TCGA-C5-A1MK | 74   | 1 | 79 | Female | White                     | G3 | Stage IIIB | Unknown | CESC |
| TCGA-EK-A2R9 | 4    | 0 | 58 | Female | White                     | G3 | Stage IB1  | Unknown | Unknown | Unknown | Unknown | T1b1    | Unknown | N0      | CESC    |      |
| TCGA-VS-A9V4 | 132  | 1 | 63 | Female | White                     | G2 | Stage IVA  | Unknown | Unknown | Unknown | Unknown | T4      | MX      | NX      | CESC    |      |
| TCGA-C5-A1MN | 1245 | 1 | 42 | Female | White                     | G2 | Stage IIIB | Unknown | CESC |
| TCGA-BI-A0VR | 1505 | 0 | 53 | Female | White                     | G3 | Stage IIIB | Unknown | Unknown | Unknown | Unknown | T2b     | M0      | N1      | CESC    |      |
| TCGA-EK-A2RE | 57   | 0 | 26 | Female | White                     | G2 | Stage IIA  | Unknown | Unknown | Unknown | Unknown | T2a2    | MX      | N0      | CESC    |      |
| TCGA-VS-A9U5 | 1367 | 0 | 57 | Female | White                     | G3 | Stage IIB  | Unknown | Unknown | Unknown | Unknown | T2b     | MX      | NX      | CESC    |      |
| TCGA-VS-A8EL | 1810 | 0 | 38 | Female | Black or African American | G3 | Stage IIB  | Unknown | Unknown | Unknown | Unknown | T2b     | M0      | NX      | CESC    |      |
| TCGA-IR-A3LB | 2032 | 1 | 53 | Female | White                     | G3 | Stage IB1  | Unknown | Unknown | Unknown | Unknown | T1b1    | M0      | N0      | CESC    |      |
| TCGA-EK-A2R7 | 27   | 0 | 45 | Female | White                     | G3 | Stage IB   | Unknown | Unknown | Unknown | Unknown | T1b1    | M0      | N1      | CESC    |      |
| TCGA-PN-A8MA | 90   | 0 | 43 | Female | Black or African American | G3 | Stage IIB  | Unknown | Unknown | Unknown | Unknown | T2b     | M0      | N0      | CESC    |      |
| TCGA-HM-A6W2 | 287  | 0 | 34 | Female | Black or African American | G3 | Stage IVB  | Unknown | Unknown | Unknown | Unknown | T2a     | M1      | N0      | CESC    |      |
| TCGA-EK-A2RJ | 53   | 0 | 51 | Female | White                     | G3 | Stage IB2  | Unknown | Unknown | Unknown | Unknown | T1b2    | MX      | N0      | CESC    |      |
| TCGA-VS-A8EC | 1232 | 0 | 55 | Female | White                     | G2 | Stage IIIB | Unknown | Unknown | Unknown | Unknown | T3b     | M0      | NX      | CESC    |      |
| TCGA-EA-A4BA | 390  | 0 | 49 | Female | White                     | G2 | Stage IB2  | Unknown | Unknown | Unknown | Unknown | T1b2    | M0      | N0      | CESC    |      |
| TCGA-C5-A3HD | 1582 | 0 | 51 | Female | White                     | G2 | Stage IIB  | Unknown | CESC |
| TCGA-C5-A1M5 | 2052 | 1 | 53 | Female | White                     | G2 | Stage IB   | Unknown | Unknown | Unknown | Unknown | T1b     | M0      | N0      | CESC    |      |
| TCGA-FU-A2QG | 579  | 0 | 29 | Female | White                     | G2 | Stage IB1  | Unknown | Unknown | Unknown | Unknown | T1b1    | Unknown | N0      | CESC    |      |
| TCGA-VS-A9UZ | 2044 | 0 | 61 | Female | White                     | G2 | Stage IB1  | Unknown | Unknown | Unknown | Unknown | T1b     | MX      | N0      | CESC    |      |
| TCGA-VS-A9V2 | 427  | 0 | 29 | Female | White                     | G2 | Stage IB1  | Unknown | Unknown | Unknown | Unknown | T1b     | MX      | N0      | CESC    |      |
| TCGA-UC-A7PG | 370  | 1 | 44 | Female | White                     | G1 | Stage IIIB | Unknown | Unknown | Unknown | Unknown | T3b     | MX      | N1      | CESC    |      |
| TCGA-FU-A3EO | 490  | 0 | 55 | Female | White                     | G2 | Stage IIB  | Unknown | Unknown | Unknown | Unknown | T2b     | MX      | N0      | CESC    |      |



|              |      |   |    |        |                                  |    |            |         |         |         |         |         |         |         |      |
|--------------|------|---|----|--------|----------------------------------|----|------------|---------|---------|---------|---------|---------|---------|---------|------|
| TCGA-FU-A3HZ | 1103 | 0 | 64 | Female | White                            | G3 | Stage IIA2 | Unknown | Unknown | Unknown | Unknown | T2a2    | M0      | N0      | CESC |
| TCGA-Q1-A6DT | 275  | 1 | 55 | Female | White                            | GX | Stage I    | Unknown | Unknown | Unknown | Unknown | TX      | MX      | NX      | CESC |
| TCGA-FU-A3TX | 45   | 0 | 78 | Female | Unknown                          | G3 | Stage IB2  | Unknown | Unknown | Unknown | Unknown | T1b2    | M0      | N0      | CESC |
| TCGA-VS-A9UH | 1427 | 0 | 53 | Female | Black or African American        | GX | Stage IVA  | Unknown | Unknown | Unknown | Unknown | T4      | MX      | NX      | CESC |
| TCGA-VS-A9V1 | 157  | 1 | 46 | Female | White                            | G2 | Stage IVB  | Unknown | Unknown | Unknown | Unknown | T3b     | MX      | NX      | CESC |
| TCGA-VS-A94X | 506  | 1 | 40 | Female | Black or African American        | G2 | Stage IIB  | Unknown | Unknown | Unknown | Unknown | T2b     | MX      | NX      | CESC |
| TCGA-C5-A1BI | 1112 | 0 | 31 | Female | White                            | G2 | Stage IIIB | Unknown | CESC |
| TCGA-C5-A1ME | 1756 | 0 | 40 | Female | White                            | G1 | Stage IB1  | Unknown | Unknown | Unknown | Unknown | T1b1    | M0      | N0      | CESC |
| TCGA-VS-A9V5 | 494  | 1 | 50 | Female | White                            | G2 | Stage IIB  | Unknown | Unknown | Unknown | Unknown | T2b     | MX      | NX      | CESC |
| TCGA-MA-AA41 | 279  | 0 | 33 | Female | White                            | G2 | Stage IIB  | Unknown | Unknown | Unknown | Unknown | T2      | M1      | N1      | CESC |
| TCGA-IR-A3LC | 3571 | 0 | 40 | Female | White                            | G3 | Stage IB1  | Unknown | Unknown | Unknown | Unknown | T1b1    | M0      | N0      | CESC |
| TCGA-VS-A952 | 1547 | 0 | 66 | Female | White                            | G2 | Stage IB1  | Unknown | Unknown | Unknown | Unknown | T1b     | MX      | N0      | CESC |
| TCGA-C5-A7CK | 4086 | 1 | 58 | Female | White                            | G2 | Stage IVA  | Unknown | CESC |
| TCGA-VS-A9UC | 691  | 0 | 32 | Female | Unknown                          | G2 | Stage IIB  | Unknown | Unknown | Unknown | Unknown | T2b     | MX      | NX      | CESC |
| TCGA-VS-A9UR | 611  | 0 | 53 | Female | White                            | GX | Stage IIA  | Unknown | Unknown | Unknown | Unknown | T2a     | MX      | NX      | CESC |
| TCGA-VS-A94Z | 742  | 0 | 38 | Female | White                            | G2 | Stage IIB  | Unknown | Unknown | Unknown | Unknown | T2b     | MX      | NX      | CESC |
| TCGA-EA-A5ZF | 455  | 0 | 56 | Female | Asian                            | G2 | Stage IB1  | Unknown | Unknown | Unknown | Unknown | T1b1    | M0      | NX      | CESC |
| TCGA-C5-A2LZ | 3046 | 1 | 65 | Female | White                            | G2 | Stage IIIB | Unknown | CESC |
| TCGA-C5-A7X5 | 414  | 1 | 72 | Female | Black or African American        | G3 | Stage IVB  | Unknown | CESC |
| TCGA-EA-A3HQ | 1136 | 0 | 60 | Female | White                            | G2 | Stage II   | Unknown | Unknown | Unknown | Unknown | T2a     | M0      | N0      | CESC |
| TCGA-EK-A2H0 | 1847 | 0 | 24 | Female | White                            | G3 | Stage IIB  | Unknown | CESC |
| TCGA-ZJ-AAXT | 0    | 0 | 54 | Female | White                            | G2 | Stage IIIB | Unknown | Unknown | Unknown | Unknown | T3b     | M0      | N1      | CESC |
| TCGA-JW-A5VL | 474  | 0 | 37 | Female | American Indian or Alaska native | G1 | Stage IB2  | Unknown | Unknown | Unknown | Unknown | T1b2    | MX      | NX      | CESC |
| TCGA-DR-A0ZM | 1791 | 0 | 61 | Female | White                            | G2 | Stage IIIB | Unknown | Unknown | Unknown | Unknown | T2b     | M0      | N0      | CESC |
| TCGA-HM-A3JJ | 659  | 1 | 40 | Female | Black or African American        | G3 | Stage IB1  | Unknown | Unknown | Unknown | Unknown | T1b1    | MX      | N1      | CESC |
| TCGA-EK-A2RC | 129  | 0 | 33 | Female | Unknown                          | G3 | Stage IB1  | Unknown | CESC |
| TCGA-VS-A958 | 1525 | 0 | 46 | Female | White                            | G2 | Stage IIB  | Unknown | Unknown | Unknown | Unknown | T2b     | MX      | NX      | CESC |
| TCGA-LP-A5U2 | 9    | 0 | 30 | Female | Asian                            | G3 | Stage IIIB | Unknown | Unknown | Unknown | Unknown | T2a     | MX      | N1      | CESC |

|              |      |   |    |        |                           |         |            |         |         |         |         |         |         |         |      |
|--------------|------|---|----|--------|---------------------------|---------|------------|---------|---------|---------|---------|---------|---------|---------|------|
| TCGA-VS-A94W | 1103 | 0 | 39 | Female | White                     | G2      | Stage IIB  | Unknown | Unknown | Unknown | Unknown | T2b     | MX      | N1      | CESC |
| TCGA-C5-A1MF | 1617 | 0 | 49 | Female | White                     | G2      | Stage IB2  | Unknown | Unknown | Unknown | Unknown | T1b2    | MX      | N0      | CESC |
| TCGA-VS-A8QM | 951  | 1 | 47 | Female | Unknown                   | GX      | Stage IVB  | Unknown | Unknown | Unknown | Unknown | TX      | M1      | NX      | CESC |
| TCGA-LP-A7HU | 406  | 0 | 53 | Female | Asian                     | G3      | Stage II   | Unknown | Unknown | Unknown | Unknown | T2      | M0      | N0      | CESC |
| TCGA-JX-A5QV | 243  | 0 | 37 | Female | White                     | G3      | Stage IB1  | Unknown | Unknown | Unknown | Unknown | T1b1    | M0      | N0      | CESC |
| TCGA-C5-A1BQ | 604  | 1 | 65 | Female | White                     | G2      | Stage IIIB | Unknown | CESC |
| TCGA-LP-A4AV | 0    | 0 | 63 | Female | Asian                     | G2      | Stage IB   | Unknown | Unknown | Unknown | Unknown | T1b     | M0      | N0      | CESC |
| TCGA-MU-A8JM | 607  | 0 | 46 | Female | White                     | G2      | Stage IB1  | Unknown | Unknown | Unknown | Unknown | T1b     | MX      | N0      | CESC |
| TCGA-EA-A410 | 803  | 0 | 51 | Female | White                     | G2      | Stage IIA2 | Unknown | Unknown | Unknown | Unknown | T2a2    | M0      | N0      | CESC |
| TCGA-C5-A1MH | 1186 | 1 | 71 | Female | White                     | G3      | Stage IIIB | Unknown | CESC |
| TCGA-C5-A7CL | 471  | 1 | 48 | Female | White                     | G2      | Stage IIIB | Unknown | CESC |
| TCGA-C5-A7CG | 6408 | 0 | 55 | Female | White                     | G2      | Stage IB   | Unknown | Unknown | Unknown | Unknown | T1b     | MX      | N0      | CESC |
| TCGA-FU-A3NI | 638  | 1 | 45 | Female | White                     | G2      | Stage IB1  | Unknown | Unknown | Unknown | Unknown | T1b1    | MX      | N1      | CESC |
| TCGA-DG-A2KM | 1218 | 0 | 46 | Female | Unknown                   | G2      | Stage IB1  | Unknown | Unknown | Unknown | Unknown | T1b1    | M0      | N1      | CESC |
| TCGA-DG-A2KK | 1544 | 0 | 51 | Female | Unknown                   | G3      | Stage IIIB | Unknown | Unknown | Unknown | Unknown | T1b1    | M0      | N1      | CESC |
| TCGA-C5-A1BL | 5271 | 0 | 32 | Female | White                     | G2      | Stage IB   | Unknown | CESC |
| TCGA-EX-A1H6 | 241  | 0 | 38 | Female | White                     | G1      | Stage IB1  | Unknown | Unknown | Unknown | Unknown | T1b1    | MX      | N0      | CESC |
| TCGA-VS-A9UO | 1260 | 0 | 43 | Female | White                     | G2      | Stage IIB  | Unknown | Unknown | Unknown | Unknown | T2b     | MX      | N0      | CESC |
| TCGA-IR-A3LH | 2394 | 0 | 49 | Female | Black or African American | G4      | Stage IIA1 | Unknown | Unknown | Unknown | Unknown | T2a1    | M0      | N0      | CESC |
| TCGA-ZJ-A8QO | 0    | 0 | 73 | Female | Unknown                   | Unknown | Unknown    | Unknown | Unknown | Unknown | Unknown | Unknown | Unknown | Unknown | CESC |
| TCGA-EK-A2RN | 71   | 0 | 45 | Female | White                     | G2      | Stage IB1  | Unknown | Unknown | Unknown | Unknown | T2b     | MX      | N1      | CESC |
| TCGA-VS-A9UP | 1316 | 0 | 43 | Female | Unknown                   | G3      | Stage IIA  | Unknown | Unknown | Unknown | Unknown | T2a     | MX      | NX      | CESC |
| TCGA-EK-A2RM | 50   | 0 | 40 | Female | White                     | G3      | Stage IB   | Unknown | CESC |
| TCGA-JW-AAVH | 552  | 0 | 46 | Female | White                     | G2      | Stage IB1  | Unknown | Unknown | Unknown | Unknown | T1b1    | M0      | N0      | CESC |
| TCGA-C5-A3HL | 621  | 0 | 76 | Female | White                     | G2      | Stage IB2  | Unknown | Unknown | Unknown | Unknown | T1b2    | MX      | N0      | CESC |
| TCGA-FU-A57G | 1078 | 0 | 49 | Female | White                     | G2      | Stage IB2  | Unknown | Unknown | Unknown | Unknown | T1b2    | MX      | N0      | CESC |
| TCGA-RA-A741 | 444  | 0 | 34 | Female | White                     | GX      | Stage IIB  | Unknown | CESC |
| TCGA-ZJ-AB0H | 0    | 0 | 48 | Female | Unknown                   | Unknown | Stage IIIB | Unknown | Unknown | Unknown | Unknown | T3b     | M0      | N1      | CESC |

|              |      |   |    |        |                           |         |            |         |         |         |         |         |         |         |      |
|--------------|------|---|----|--------|---------------------------|---------|------------|---------|---------|---------|---------|---------|---------|---------|------|
| TCGA-LP-A5U3 | 25   | 0 | 40 | Female | Asian                     | G3      | Stage IB1  | Unknown | Unknown | Unknown | Unknown | T1b1    | M0      | N0      | CESC |
| TCGA-EA-A3Y4 | 441  | 0 | 40 | Female | White                     | G3      | Stage IB   | Unknown | Unknown | Unknown | Unknown | T1b     | M0      | N0      | CESC |
| TCGA-FU-A5XV | 321  | 0 | 32 | Female | White                     | G3      | Stage IIIB | Unknown | Unknown | Unknown | Unknown | T1b2    | MX      | N1      | CESC |
| TCGA-VS-A950 | 1210 | 0 | 42 | Female | Unknown                   | G3      | Stage IIIA | Unknown | Unknown | Unknown | Unknown | T3a     | MX      | NX      | CESC |
| TCGA-C5-A2LY | 2383 | 0 | 30 | Female | White                     | G2      | Stage IB1  | Unknown | Unknown | Unknown | Unknown | T1b1    | M0      | N0      | CESC |
| TCGA-EA-A3HT | 954  | 0 | 68 | Female | White                     | G1      | Stage IB   | Unknown | Unknown | Unknown | Unknown | T1b     | M0      | N0      | CESC |
| TCGA-C5-A7UH | 3988 | 0 | 55 | Female | White                     | G3      | Stage IIIB | Unknown | CESC |
| TCGA-C5-A905 | 4879 | 0 | 37 | Female | Black or African American | G2      | Stage IB   | Unknown | Unknown | Unknown | Unknown | T1b     | MX      | N0      | CESC |
| TCGA-EA-A97N | 11   | 0 | 38 | Female | White                     | G2      | Stage IB2  | Unknown | Unknown | Unknown | Unknown | T1b2    | M0      | N0      | CESC |
| TCGA-DS-A7WH | 533  | 0 | 34 | Female | White                     | G2      | Stage IB1  | Unknown | Unknown | Unknown | Unknown | T1b1    | MX      | N0      | CESC |
| TCGA-Q1-A73Q | 284  | 0 | 46 | Female | White                     | GX      | Stage I    | Unknown | Unknown | Unknown | Unknown | TX      | MX      | NX      | CESC |
| TCGA-DS-A0VK | 1118 | 1 | 45 | Female | White                     | G3      | Stage IB   | Unknown | Unknown | Unknown | Unknown | T1b1    | M0      | N1      | CESC |
| TCGA-Q1-A5R1 | 474  | 0 | 32 | Female | White                     | G2      | Stage IB1  | Unknown | Unknown | Unknown | Unknown | T1b1    | MX      | N0      | CESC |
| TCGA-VS-A8EJ | 607  | 1 | 60 | Female | White                     | G3      | Stage IIB  | Unknown | Unknown | Unknown | Unknown | T2b     | M1      | NX      | CESC |
| TCGA-EK-A2PL | 13   | 0 | 36 | Female | White                     | Unknown | Stage IIIB | Unknown | CESC |
| TCGA-EA-A5FO | 427  | 0 | 59 | Female | White                     | G2      | Stage IB1  | Unknown | Unknown | Unknown | Unknown | T1b1    | M0      | N0      | CESC |
| TCGA-FU-A770 | 34   | 0 | 33 | Female | White                     | G2      | Stage IIIB | Unknown | Unknown | Unknown | Unknown | T2a2    | MX      | N1      | CESC |
| TCGA-C5-A7XC | 1551 | 0 | 26 | Female | White                     | G2      | Stage IB1  | Unknown | Unknown | Unknown | Unknown | T1b     | M0      | N0      | CESC |
| TCGA-ZJ-AAXA | 43   | 0 | 64 | Female | White                     | G2      | Stage IB1  | Unknown | Unknown | Unknown | Unknown | T1b     | MX      | N0      | CESC |
| TCGA-MY-A5BE | 1066 | 0 | 42 | Female | Black or African American | G3      | Stage IB1  | Unknown | Unknown | Unknown | Unknown | T1b1    | MX      | N0      | CESC |
| TCGA-Q1-A5R2 | 499  | 0 | 64 | Female | White                     | G3      | Unknown    | Unknown | Unknown | Unknown | Unknown | TX      | MX      | NX      | CESC |
| TCGA-HG-A2PA | 773  | 0 | 38 | Female | White                     | G2      | Stage IB2  | Unknown | Unknown | Unknown | Unknown | T1b2    | M0      | N0      | CESC |
| TCGA-Q1-A73P | 483  | 0 | 45 | Female | White                     | G1      | Stage IB1  | Unknown | Unknown | Unknown | Unknown | T1b     | MX      | N0      | CESC |
| TCGA-VS-A9UU | 442  | 0 | 42 | Female | Unknown                   | G1      | Stage IIB  | Unknown | Unknown | Unknown | Unknown | T2b     | MX      | NX      | CESC |
| TCGA-DS-A1OC | 376  | 0 | 47 | Female | White                     | G2      | Stage IB   | Unknown | Unknown | Unknown | Unknown | T1b1    | M0      | N1      | CESC |
| TCGA-FU-A3HY | 954  | 0 | 47 | Female | White                     | G2      | Stage IB2  | Unknown | Unknown | Unknown | Unknown | T1b2    | MX      | N1      | CESC |
